# Supplementary material for: Mexican agricultural soil dust as a source of ice nucleating particles
Source: Copernicus journal article supplement (doi:10.5194/acp-22-6435-2022), 2022-05-19
Supplement: Supplementary file 1 [file acp-22-6435-2022-supplement.pdf]

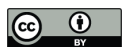

*Supplement of*

## **Mexican agricultural soil dust as a source of ice nucleating particles**

**Diana L. Pereira et al.**

*Correspondence to:* Luis A. Ladino (luis.ladino@atmosfera.unam.mx)

The copyright of individual parts of the supplement might differ from the article licence.

## Figures

Figures S2 and S3 were made from the  $T_{50}$  values of the different frozen fraction curves. The box plot figures contain information about the median  $T_{50}$ , the bottom and top edges of the box indicate the 25<sup>th</sup> and 75<sup>th</sup> percentiles. The whiskers represent the extreme data points and the red pluses the outlier values.

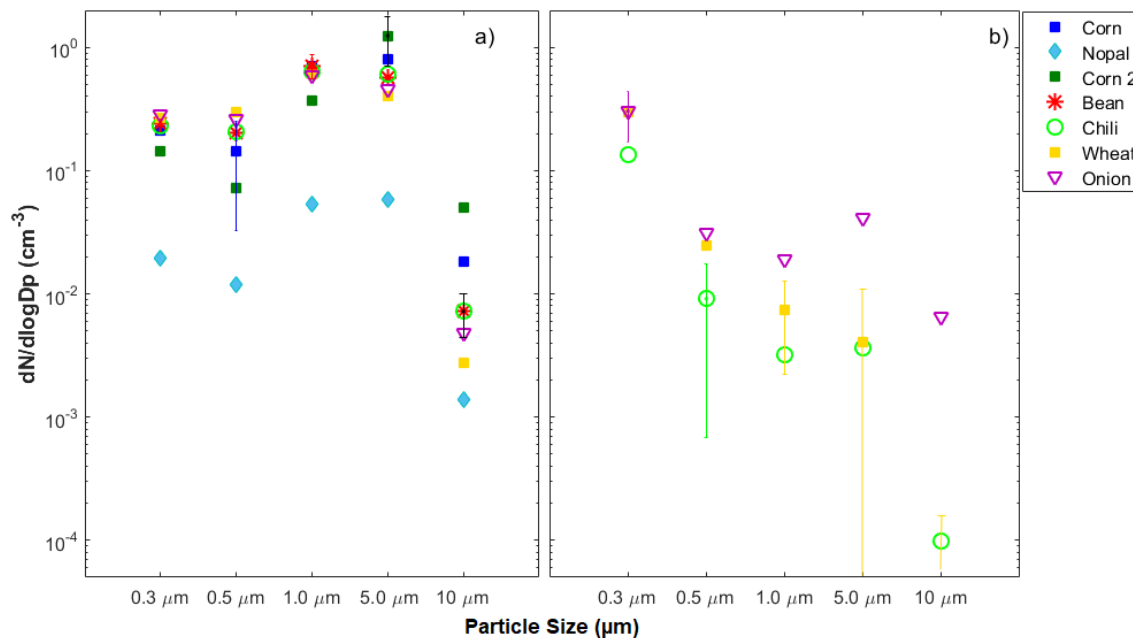

5

**Figure S1:** Particle size distribution for a) Laboratory samples, and b) Field samples. The symbols in colors show the mean values of the aerosol particle concentrations from the different soil samples, and the error bars represent the typical values of the standard deviation for each particle size.

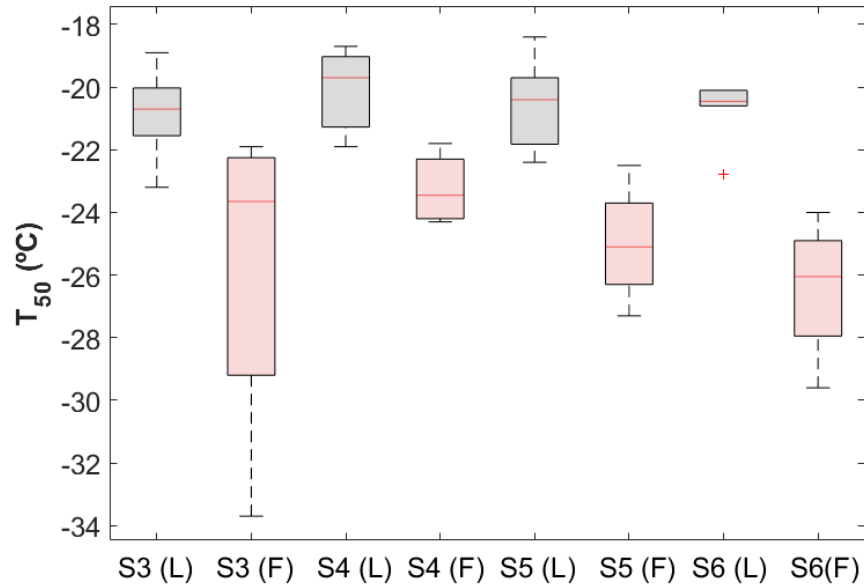

10

**Figure S2:** Average  $T_{50}$  of the Zacatecas aerosol samples collected at the field (F, red boxes) and those generated in the laboratory (L, grey boxes) for the Zacatecas soils samples for particles ranging between 3.2 and 5.6  $\mu\text{m}$  (S3), 1.8 and 3.2  $\mu\text{m}$  (S4), 1.0 and 1.8  $\mu\text{m}$  (S5), and 0.56 and 1.0  $\mu\text{m}$  (S6). The red cross indicates an outlier value of the  $T_{50}$ .

15

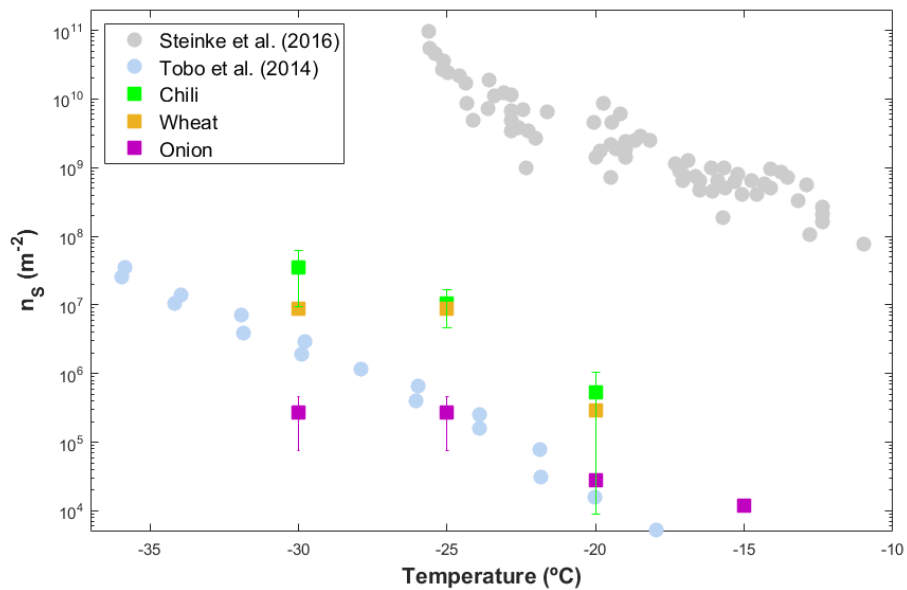

**Figure S3:** Ice nucleation active surface site (INAS) density ( $n_s$ ) as a function of the temperature for aerosol particles collected during the Zacatecas field campaign. The error bars represent the standard deviation and the gray and blue soft circles show results from previous studies.

20

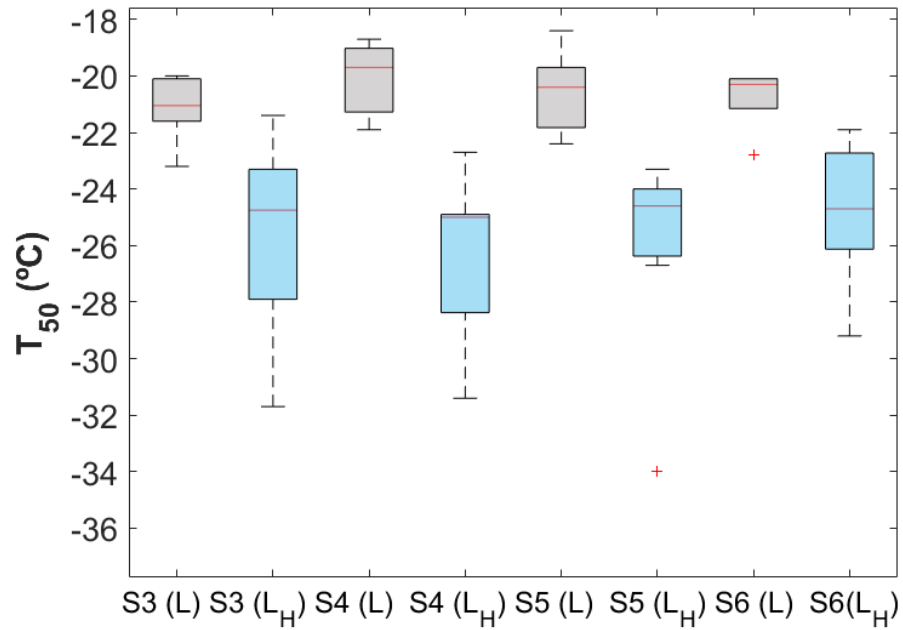

**Figure S4:** Average  $T_{50}$  for the Zacatecas agricultural dust particles generated in the laboratory (L) before (grey boxes) and after (blue boxes) the heating treatment for particle sizes ranging between 3.2 and 5.6  $\mu\text{m}$  (S3), 1.8 and 3.2  $\mu\text{m}$  (S4), 1.0 and 1.8  $\mu\text{m}$  (S5), and 0.56 and 1.0  $\mu\text{m}$  (S6). The heated samples are represented by the letter H. The red cross indicates an outlier value of the  $T_{50}$ . The corn sample data was excluded for S3, as well as the bean and chili samples data for S6.

30

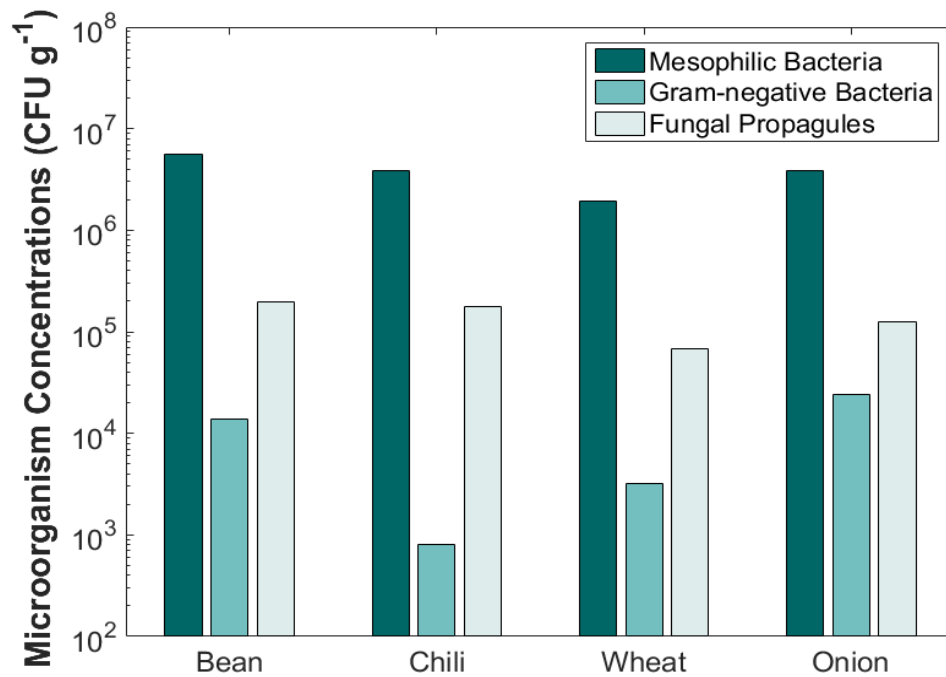

**Figure S5:** Concentration of microorganisms observed in soil samples collected in ZAC. Samples were cultured on Trypticase Soy Agar, MacConkey Agar, and Malt Extract Agar for mesophilic bacteria, gram-negative bacteria, and fungal propagules, respectively.

35

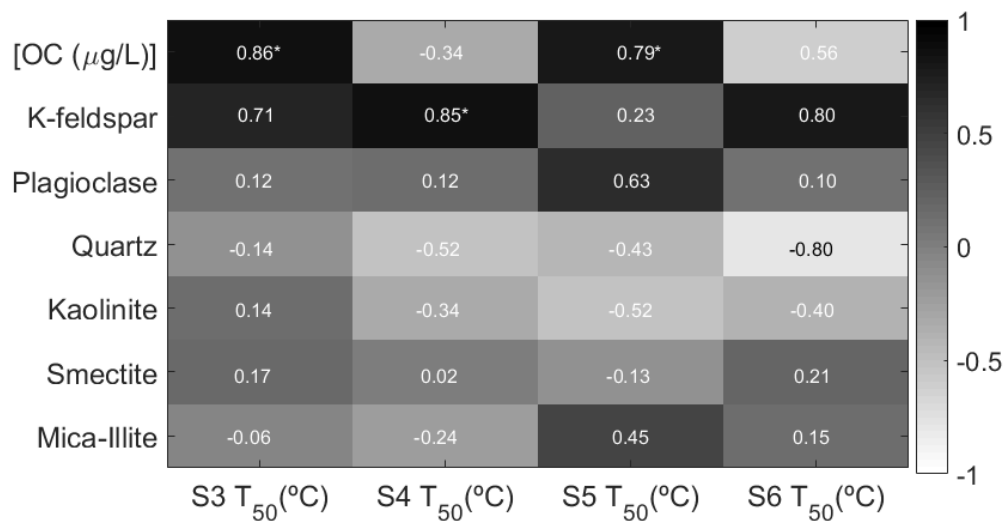

**Figure S6:** Correlation map between T<sub>50</sub>, the concentration of the mineral phases, and the OC concentration for particle ranging between 3.2 and 5.6 μm (S3), 1.8 and 3.2 μm (S4), 1.0 and 1.8 μm (S5), and 0.56 and 1.0 μm (S6).

40

**Table S1:** Summary of the average meteorological conditions observed during the Zacatecas sampling campaign. The samples were collected between 4 h and 6 h.

| Sample name | Date       | Latitude/<br>Longitude  | Temperature<br>(°C) | Relative<br>humidity (%) | Radiation<br>W/m <sup>2</sup> | Wind speed<br>(km/h) |
|-------------|------------|-------------------------|---------------------|--------------------------|-------------------------------|----------------------|
| Bean        | 24/02/2020 | 22.8050°N<br>102.6750°W | 21.79               | 21.48                    | 778.13                        | 18.50                |
| Chili       | 25/02/2020 | 22.8380°N<br>102.6853°W | 16.52               | 36.80                    | 483.32                        | 12.64                |
| Wheat       | 26/02/2020 | 22.8508°N<br>102.6476°W | 16.10               | 20.22                    | 760.41                        | 15.67                |
| Onion       | 27/02/2020 | 22.8164°N<br>102.6791°W | 17.49               | 37.80                    | 763.87                        | 9.39                 |

45

**Table S2:** Summary of the temperature shifts ( $\Delta T_{50}$ ) observed for the aerosol samples generated in the laboratory after the heat treatment. The results are reported for particles sizes ranging between 3.2 and 5.6  $\mu\text{m}$  (S3), 1.8 and 3.2  $\mu\text{m}$  (S4), 1.0 and 1.8  $\mu\text{m}$  (S5), and 0.56 and 1.0  $\mu\text{m}$  (S6).

| Soil crop<br>Sample | $\Delta T_{50}$ (°C) |       |      |      |
|---------------------|----------------------|-------|------|------|
|                     | S3                   | S4    | S5   | S6   |
| Corn                | N/A                  | -7,6  | -5,4 | -4,6 |
| Nopal               | -5,9                 | -5,2  | -3,7 | -2,9 |
| Corn 2              | -11,7                | -11,7 | -14  | -8,9 |
| Bean                | -1,9                 | -3    | -6,3 | N/A  |
| Chili               | -6,3                 | -9,6  | -5   | N/A  |
| Wheat               | -0,3                 | -3,2  | -2,3 | -2,3 |
| Onion               | -0,7                 | -4    | -2,2 | -1,3 |

N/A shows not available data as the heat samples were damaged during the experiments.
